# Supplementary material
Source: MDPI journal article supplement (https://www.mdpi.com/2227-7102/12/11/810)
Supplement: s1 [file s1]

# Auswertung zur Veranstaltung N kommunizieren - Global Perspectives on Sustainability Transitions

Liebe Dozentin, lieber Dozent,

anbei erhalten Sie die Ergebnisse der Evaluation Ihrer Lehrveranstaltung.

Zu dieser Veranstaltung wurden 20 Bewertungen (bei 20 TeilnehmerInnen) abgegeben. Dies entspricht einer Rücklaufquote von 100%.

Erläuterungen zu den Diagrammen befinden sich am Ende dieses Dokuments.

Mit freundlichen Grüßen,

Das Evaluationsteam

## Teaching Skills

|                                                                                                                                   |                                                                                                                                                |
|-----------------------------------------------------------------------------------------------------------------------------------|------------------------------------------------------------------------------------------------------------------------------------------------|
| <p>agree disagree</p> <p>The learning objectives were clearly stated at the beginning of the seminar.</p>                         | <p>fully applies does not apply at all</p> <p>The learning objectives were consistently implemented by the instructor.</p>                     |
| <p>agree disagree</p> <p>The teacher explained in an understandable way..</p>                                                     | <p>fully applies does not apply at all</p> <p>The seminar has introduced me to basic concepts and perspectives of sustainable development.</p> |
| <p>fully applies does not apply at all</p> <p>The instructor has illustrated the practical relevance of the learning content.</p> | <p>fully applies does not apply at all</p> <p>The teachers encouraged the communication and collaboration between the students.</p>            |
| <p>fully applies does not apply at all</p> <p>The instructor was committed.</p>                                                   | <p>fully applies does not apply at all</p> <p>The instructor motivated the students to engage with the topic beyond the seminar.</p>           |

## Seminar

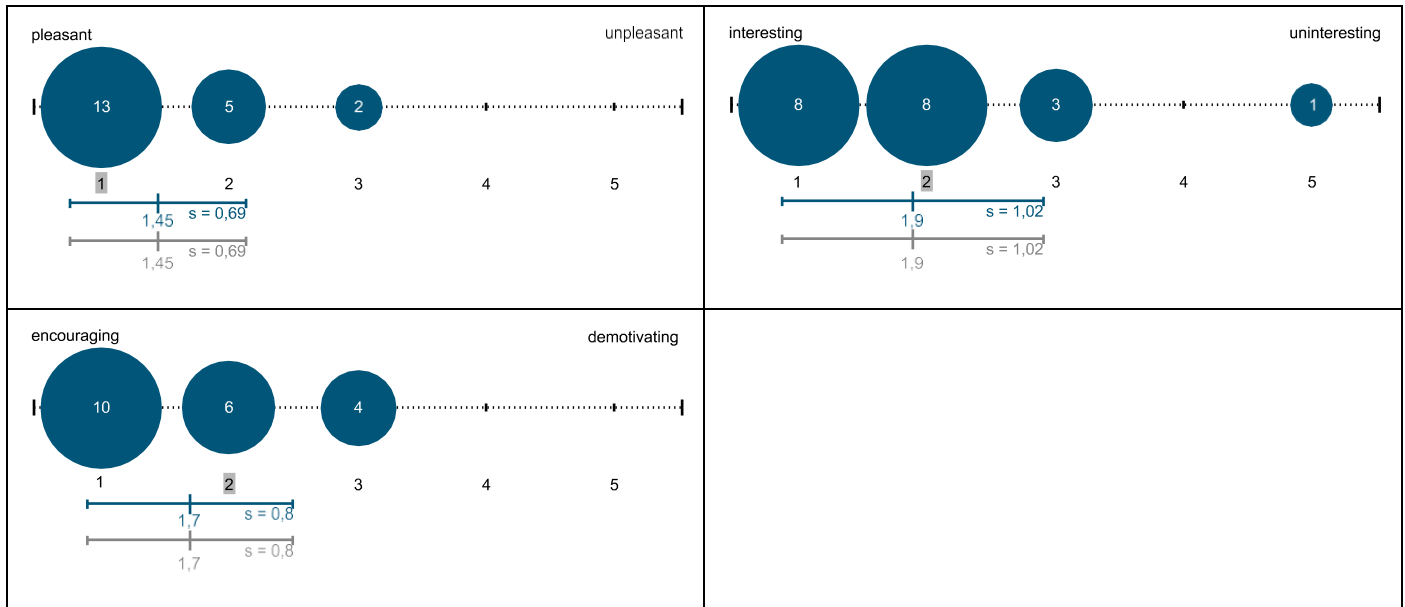

What was your main motivation behind selecting this course? What expectations did you have of the seminar/course? Which of them were fulfilled/not fulfilled?

- I needed the credits for my studies (ABV-Bereich)
- No expectations
- I joined the course for two reasons: first, to continue participating in inter-university projects, and second, to have a chance to travel to Germany. My expectations were fully met since I was looking forward to a project that emphasized teamwork (as well as individual participation and investigation) in relation to sustainability. Of course, the prospect of a trip was highly motivating and made me work even harder than if there had not been a "reward" of some sort.
- I liked the idea of a blended course and mixing my experience and knowledge with students from a different cultural and academic background.
- Interacting with other students and practicing English was the best part
- I wanted to learn about sustainable development concepts, which I did. Although, I don't know if the concept of the interactive courses worked very well. Because most of the students were hesitant to participate and give their opinion. They need more encouragement or group work.
- I was seeking to learn about international politics and also traveling to Berlin
- Learning english and i think its fulfilled
- Learning more things about sustainability and getting to know a new country and people. I was not expecting having "fun" in the seminar but it was a really good and motivational.
- Madrid
- Meeting students from Madrid
- My main motivación was to lean more about sustainable measures and I expected to lean alot of new things on the course. I fulfilled my knowledge of sustainability and practice english.
- My main motivation was to get acquainted with the ways in which the Berlin administration and institutions implement innovative strategies to placate climate change and encourage people to adopt sustainable habits. I expected to gain a general view of the SDGs and have the oportunity to come to Berlin and exchange conversation with FBU students. They were all fulfilled.
- Participative course and connecting with students from Spain
- Personal interest for future job  
Not really fulfilled, because there were no topic about job perspectives
- Simulation Game, it was good
- The main motivation was getting to know students from Berlin. I am interesting in politics, so it was an interesting seminar about a topic beyond my own degree.
- The opportunity to go to Berlin and meet other students.

What did you like about the seminar?

- Meeting the spanish students and working with them
- having the planspiel
- Connection with spanish students
- I like that it was easy to follow and interdisciplinary.
- intercultural exchange
- It is interesting and very relevant nowadays
- It was interactive and fun.
- Meeting different students from other countries with different perspectives
- Participative course and connecting with students from Spain
- Teamwork, patience, good mood, the importance of the topics at hand.
- That it was fun to meet new people from different countries while you are learning something you like.
- the atmosphere in special
- The exchange with the Spanish students & especially the simulation game - best part of the seminar.
- The flexibility to meet, the blended flormat.
- The international aspect
- The simulation game and exchange with Spanish students
- The simulation game was really nice and I do enjoyed it too much. I also had a lot of fun with my Spanish and German teammates.

How do you think the seminar could be improved?

- organization: discuss beforehand where and when to meet/repeat it regularly
- maybe design a one-page overview with the most important deadlines
- online sessions: more interactive, more short breaks
- Berlin students should also get the opportunity to go to Madrid.
- Group work, working on a project throughout the course with breakout sessions, getting input throughout from the professors
- If the classes were more compact and integrated
- I think more participation from students would greatly improve the seminar. Clearer instructions would be nice as well.
- It would be nice to spend more time in Germany so we could have more time to know each other and also to do more simulations.
- less time together
- More in depth information on SDGs (not just introductory)
- More organization and clearer expectations for the course and it's requirements. It was confusing at times
- probably been more dynamic
- Spanish people could travel with train not plane
- More input, those activities could be supported with more input
- Maybe sustainability skills that could be helpful in future jobs/ studies
- That the German student's came to Spain to do an exchange.
- The German students could also get the chance to go to Spain leading to more motivation and live interactions
- The lectures should have been more structured. The concept was quite blurry and most of the course contents relied on students Presentation. More instructor input in a structured manner.
- Also a joint learning platform would have been great.
- The instructor did not provide a good structure nor clear objectives.
- There should be an exchange between both countries not only from madrid.
- With more thorough guidance. On the humanities side, we do not get to deepen into the topic and so we need to be guided to contribute to the project.

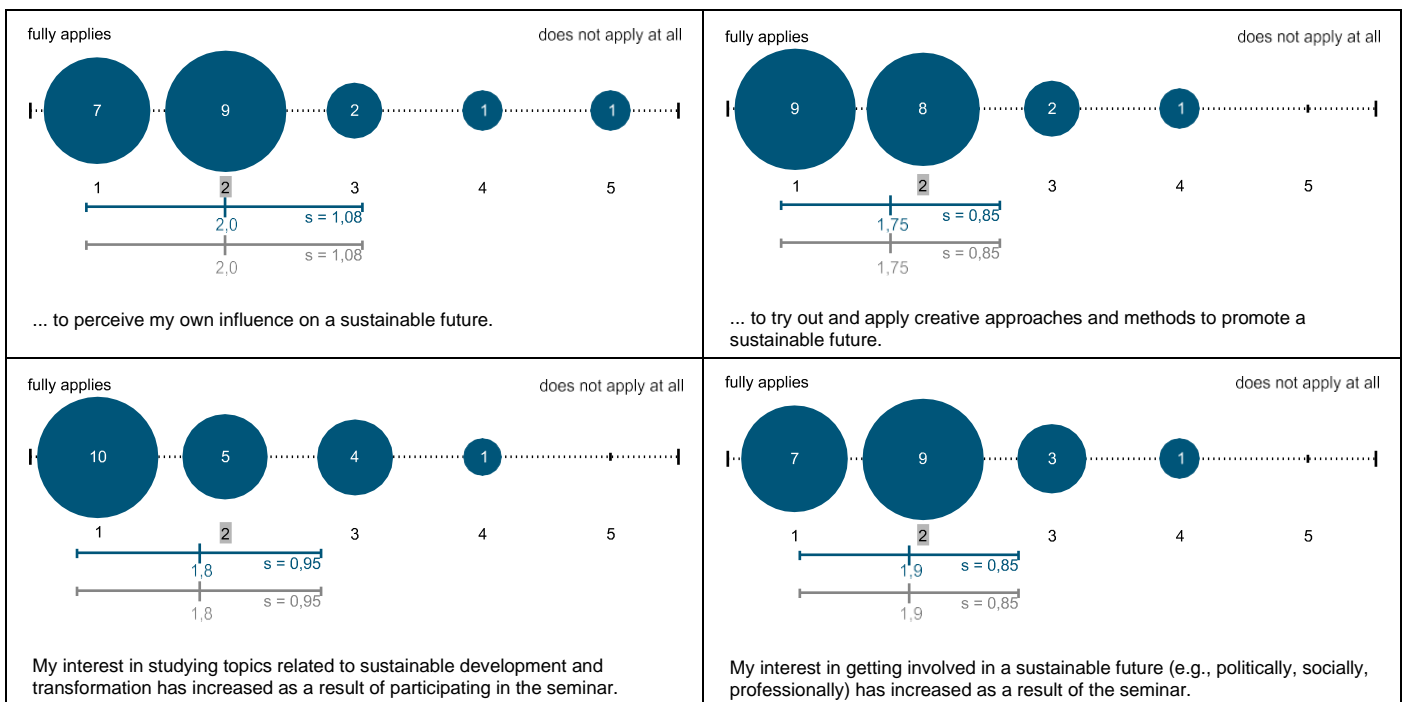

How did you (not) benefit from being taught by two international teachers/universities?

- they brought in much new knowledge and humor
- they were great to work with
- interesting, new people
- infos about spain and the living there
- By being able to observe the different approaches to engaging with students.
- Different perspectives
- Good: Variation of methodologies
- Great
- I got to experience different academic cultures
- It benefits me in alot of ways. I learn from profesionales and they are really interested on this field so the course is more interesting and entertaining for me.
- I think it was nice to speak in English and compare different perspectives.
- It was a good mixture
- It was interesting to see the different methodologies applies by the teachers, leading to different dynamics during the course.
- It was really nice as we could get both perspectives and ideas of each of them. They were really committed with the course and it was really motivational
- Nice mix
- Perspectives from different countries are interesting
- Since they have different knowledge each from their field, it was interesting to learn from them
- Two different perspectives & backgrounds.

How did you (not) benefit from the participation of a student group from another country/university?

-

- A lot of different perspectives, experiences and lively discussions.  
New connections and academic insights in a European context - especially interesting in the context of Europe wide energy transitions efforts etc

It would have been fair, if we also had the opportunity to travel to Spain

- By listening to people from different backgrounds apply different solutions derived from two different administrations.

But sometimes communication did not flow in the online format, as we had different schedules and the project was too open.

- Good
- Great
- Helpful to have different perspectives
- I got to meet new people with different backgrounds and experiences
- It is a nice opportunity to meet people with similar interests but different approaches.
- I was able to hear many different opinions
- Perspectives from different countries are interesting
- See different perspectives and methodologies
- Sometimes language barriers
- That I learn more about their culture and it's always fun to meet new people from across the world.
- The best experience of all. Meeting each other and working together is very encouraging and getting to know the country with its native people and spending time with them was the best of the course
- Treating with people from different countries is, I feel, essential to understand that we are not that different after all and that it simply requires more time to understand another point of view that may even challenge ours, but it always leads to growth.

|                                                                                                                                                                                                                           |                                                                                                                                                                             |
|---------------------------------------------------------------------------------------------------------------------------------------------------------------------------------------------------------------------------|-----------------------------------------------------------------------------------------------------------------------------------------------------------------------------|
| <p>fully applies</p> <p>does not apply at all</p> <p>By attending the course, I was able to improve my English skills.</p>                                                                                                | <p>fully applies</p> <p>does not apply at all</p> <p>By attending the course, I got to know different cultural or national perspectives on the topic of sustainability.</p> |
| <p>yes</p> <p>no</p> <p>Have you already participated in a physical exchange programme at university before?</p>                                                                                                          | <p>fully applies</p> <p>does not apply at all</p> <p>After attending the course, I am more in favour of participating in a physical exchange program.</p>                   |
| <p>fully applies</p> <p>does not apply at all</p> <p>After attending the course, I am more in favour of participating in a physical exchange program at Freie Universität Berlin / Universidad Complutense de Madrid.</p> |                                                                                                                                                                             |

## Mediendidaktik Block

### Allgemeine Fragen

1) How did the cooperation and communication with the students from the partner university work **during** the online sessions?

- -that was rather difficult, I didn't talk to any of them outside the course before I met them here
- It was a bit difficult because not everyone engages with the same intensity.
- it was great
- It was hard to be "in a group" because the online format is colder. The immediate context does not allow for communication without overlapping.
- It was really fluent and natural. They are very polite but also nice people
- not at all
- Not good enough. I would've loved to see more discussion during the online sessions instead of it being the same 5 people participating.
- Ok
- The participation was not equal. It seemed more Spanish students participated in the online sessions
- They were fine. We are in general a hard working group of people.
- Very good All student were really nice and funny
- Very well
- Well, but would be easier if there was a live meeting both at beginning and end
- Worked fine.

2) How did the cooperation and communication with the students from the partner university work **outside** the online sessions?

- -perfect
- At the simulation game there was a lot of cooperation and participation on both sides
- good
- It was as difficult or as easy as communicating with other students for group projects.
- It was different as online sessions were a little boring and not very interactive
- Much better. We could meet more freely and talk to everyone, we reached agreements faster and were more efficient.
- perfect
- Perfectly smooth. Everyone was kind, patient and understanding.
- The only communication that happened was for the final presentation which the Spanish people didn't really have to participate in. So they didn't seem very motivated and communication was a bit difficult.
- They were excellent. They are very nice people.
- Very well
- Well
- Yes, even better than online

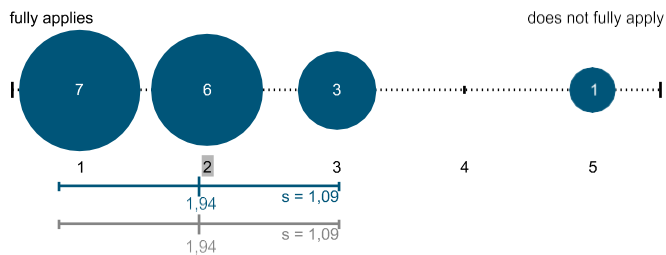

3) There were enough opportunities for exchange with the students from the partner university.

4) Were there particular digital tools that you would have liked to have for the collaboration or communication in the course?

- -
- Computers
- Everything was fine to work with.
- Google Tools are fine but they take time to master. I like to keep things simple.
- I think Webex was fine.
- No (3 Mal)

How did you like the balance of synchronous (i.e. direct contact with teacher) and asynchronous (i.e. self-study, self-organisation) phases?

- -in general, it worked very well for me
- I liked it.
- I think a session a week was enough. Maybe more weeks of the course would have been better to deepen the subjects.
- I think it was a good balance
- It was easy to connect every Monday and I like the idea of doing the simulation games in Berlin.
- I would have liked more guidance and also to be obliged to form international groups according to one another's field.
- Perfect.
- They were both interesting and nice
- Yes

How did you like the balance of online and face-to-face phases?

- -not enough face2face
- Face to face sessions were the best ones and it was nice that they were at the end as we could already have this nice view of the course and amazing experience
- fair distribution of funding to Fu student as well and not let people from Madrid come to Berlin and pay flight hotel food and Berlin get nothing

- Good
- Good, though a longer interaction with the partner university would've been even better, as the first day feels like an introduction and the next day it's over.
- I liked it.
- I preferred face-to-face sessions much better. But taking into account the limitations the course was balanced.
- It was perfect the balance of online and face to face phases.
- Liked it
- More face-to-face sessions would have been better, people participate way more.
- More face-to-face would benice
- More in person classes and face to face phases definitely

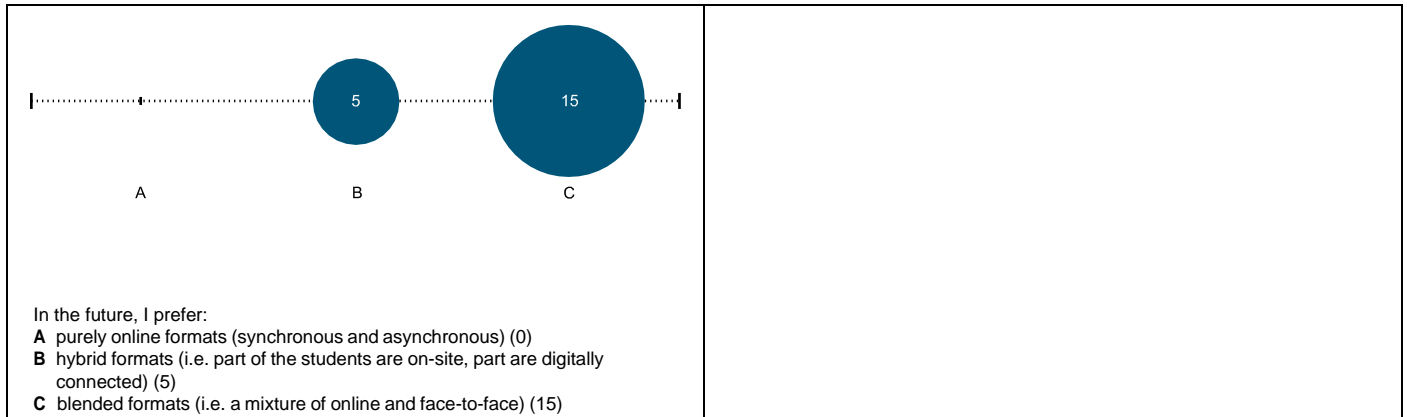

## Legende

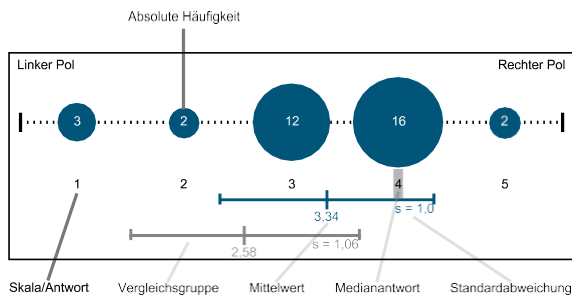

# Auswertungsprofil zur Veranstaltung "N kommunizieren - Global Perspectives on Sustainability Transitions "

Zu dieser Veranstaltung wurden 20 Bewertungen (bei 20 Teilnehmenden) abgegeben. Dies entspricht einer Beteiligung von 100%.

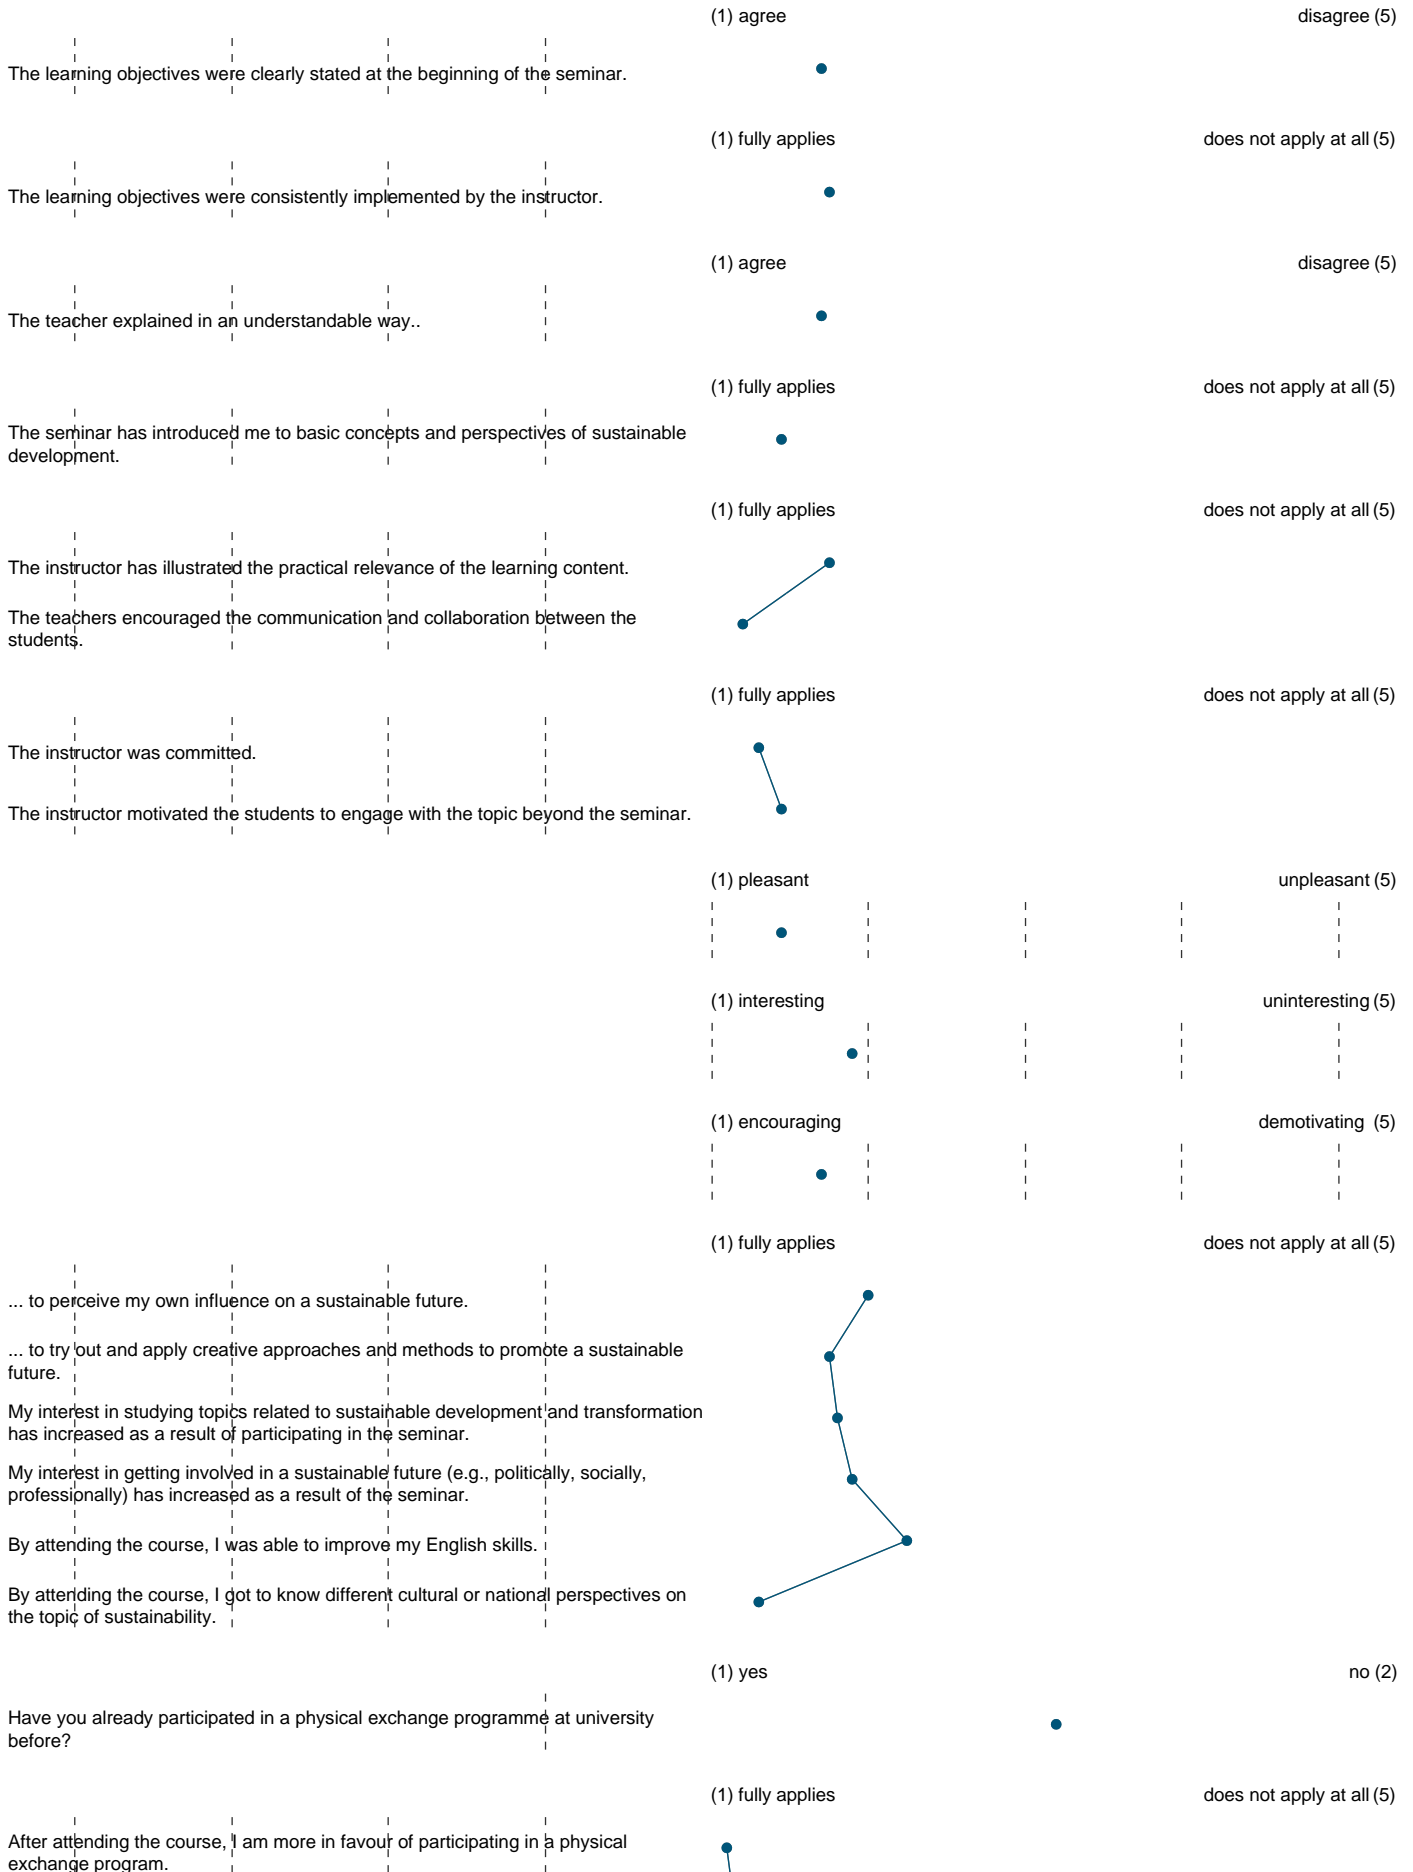

|                                                                                                                                                                  | (1) fully applies                | does not apply at all (5)        |
|------------------------------------------------------------------------------------------------------------------------------------------------------------------|----------------------------------|----------------------------------|
| After attending the course, I am more in favour of participating in a physical exchange program at Freie Universität Berlin / Universidad Complutense de Madrid. | <input checked="" type="radio"/> |                                  |
| 3) There were enough opportunities for exchange with the students from the partner university.                                                                   | <input type="radio"/>            | <input checked="" type="radio"/> |
